# Supplementary material
Source: publisher figshare collection journal article supplement (https://rs.figshare.com/ndownloader/files/12297311)
Supplement: Supplementary file 1 [file 12297311]

## SUPPLEMENTARY TABLES & SUMMARY STATISTICS

**Supplementary Table 1.** Objective Performance in Experiment 1

| EXP 1          | Single-Task (ST)                        | Dual-Task (DT)  | Two-way ANOVA p-values |       |                   |
|----------------|-----------------------------------------|-----------------|------------------------|-------|-------------------|
|                |                                         |                 | attention [ST vs DT]   | block | attention x block |
| Faces          | .78 ± .013                              | .75 ± .012      | <b>0.039</b>           | >.25  | >.25              |
| Letter         | .80 ± .014                              | .76 ± .027      | <b>0.025</b>           | >.25  | >.25              |
| Letter + Faces | Tradeoff ( <b>TA<sup>actual</sup></b> ) |                 |                        |       |                   |
|                | mean±sem                                | p against 0     | p against 1            |       |                   |
|                | .77 ± .063                              | <b>&lt;.001</b> | <b>0.007</b>           |       |                   |

**Supplementary Table 2.** Mean confidence ratings for correct and incorrect trials in Experiment 1

| EXP 1              | ST                                               | DT                                               |                                                 |
|--------------------|--------------------------------------------------|--------------------------------------------------|-------------------------------------------------|
| Faces (correct)    | 2.6 ± .18                                        | 2.5 ± .19                                        | Attention:<br>$\chi^2=3.8$ , $p=.053$           |
| Faces (incorrect)  | 2.1 ± .19                                        | 2.2 ± .18                                        | Attention:<br>$\chi^2=1.9$ , $p=.171$           |
|                    | <b>Correctness:</b><br>$\chi^2=174.0$ , $p<.001$ | <b>Correctness:</b><br>$\chi^2=112.9$ , $p<.001$ | <b>Interaction:</b><br>$\chi^2=4.26$ , $p=.039$ |
|                    | ST                                               | DT                                               |                                                 |
| Letter (correct)   | 2.9 ± .16                                        | 2.8 ± .16                                        | <b>Attention:</b><br>$\chi^2=13.9$ , $p<.001$   |
| Letter (incorrect) | 2.5 ± .19                                        | 2.5 ± .20                                        | Attention:<br>$\chi^2=.003$ , $p>.25$           |
|                    | <b>Correctness:</b><br>$\chi^2=182.5$ , $p<.001$ | <b>Correctness:</b><br>$\chi^2=120.5$ , $p<.001$ | <b>Interaction:</b><br>$\chi^2=4.15$ , $p=.042$ |

**Supplementary Table 3.** Metacognitive accuracy in Experiment 1

| EXP 1                      | ST         | DT           | Two-way ANOVA p-values |       |                   |
|----------------------------|------------|--------------|------------------------|-------|-------------------|
|                            |            |              | attention [ST vs DT]   | block | attention x block |
| Faces                      | .62 ± .017 | .59 ± .014   | <b>0.042</b>           | 0.155 | >.25              |
| Letter                     | .64 ± .017 | .60 ± .022   | <b>0.016</b>           | >.25  | >.25              |
| <b>TA<sup>actual</sup></b> |            |              |                        |       |                   |
|                            | mean±sem   | p against 0  | p against 1            |       |                   |
| Letter + Faces             | .50 ± .123 | <b>0.005</b> | <b>0.005</b>           |       |                   |

**Supplementary Table 4.** Objective Performance in Experiment 2

| EXP 2                           | ST          | Dual-Task Partial-Report (pDT) | Dual-Task Whole-Report (wDT) |
|---------------------------------|-------------|--------------------------------|------------------------------|
| Disks                           | .77 ± .012  | .57 ± .020                     | .53 ± .011                   |
| Letter                          | .79 ± .016  | .72 ± .027                     | .75 ± .020                   |
| <b>TA<sup>actual</sup></b>      |             |                                |                              |
|                                 | mean±sem    | p against 0                    | p against 1                  |
| Letter + Disks (whole-report)   | -.04 ± .055 | >.25                           | <b>&lt;.001</b>              |
| Letter + Disks (partial-report) | .02 ± .100  | >.25                           | <b>&lt;.001</b>              |

**Supplementary Table 5.** Mean confidence ratings for correct and incorrect trials in Experiment 2

| EXP 2              | ST                                                           | pDT                                                          | wDT                                                          |                                                              |
|--------------------|--------------------------------------------------------------|--------------------------------------------------------------|--------------------------------------------------------------|--------------------------------------------------------------|
| Disks (correct)    | 2.6 ± .24                                                    | 1.9 ± .16                                                    | 1.8 ± .17                                                    | <b>Attention:</b><br><b>x<sup>2</sup>=796.9, p&lt;.001</b>   |
| Disks (incorrect)  | 2.2 ± .24                                                    | 1.8 ± .14                                                    | 1.8 ± .18                                                    | <b>Attention:</b><br><b>x<sup>2</sup>=146.1, p&lt;.001</b>   |
|                    | <b>Correctness:</b><br><b>x<sup>2</sup>=111.4, p&lt;.001</b> | <b>Correctness:</b><br><b>x<sup>2</sup>=13.6, p&lt;.001</b>  | Correctness:<br>x <sup>2</sup> =1.3, p>.25                   | <b>Interaction:</b><br><b>x<sup>2</sup>=68.98, p&lt;.001</b> |
|                    |                                                              |                                                              |                                                              |                                                              |
|                    | ST                                                           | pDT                                                          | wDT                                                          |                                                              |
| Letter (correct)   | 2.8 ± .22                                                    | 2.6 ± .16                                                    | 2.5 ± .17                                                    | <b>Attention:</b><br><b>x<sup>2</sup>=90.9, p&lt;.001</b>    |
| Letter (incorrect) | 2.5 ± .24                                                    | 2.1 ± .16                                                    | 2.2 ± .18                                                    | <b>Attention:</b><br><b>x<sup>2</sup>=78.0, p&lt;.001</b>    |
|                    | <b>Correctness:</b><br><b>x<sup>2</sup>=83.0, p&lt;.001</b>  | <b>Correctness:</b><br><b>x<sup>2</sup>=147.8, p&lt;.001</b> | <b>Correctness:</b><br><b>x<sup>2</sup>=122.2, p&lt;.001</b> | <b>Interaction:</b><br><b>x<sup>2</sup>=6.42, p=.040</b>     |

**Supplementary Table 6.** Metacognitive accuracy in Experiment 2

| EXP 2                               | ST                         | pDT          | wDT             | Two-way ANOVA p-values      |       |                      |
|-------------------------------------|----------------------------|--------------|-----------------|-----------------------------|-------|----------------------|
|                                     |                            |              |                 | attention<br>[ST, pDT, wDT] | block | attention x<br>block |
| Disks                               | .61 ± .013                 | .53 ± .010   | .50 ± .011      | <b>&lt;.001</b>             | >.25  | >.25                 |
| Letters                             | .60 ± .015                 | .62 ± .019   | .61 ± .018      | >.25                        | 0.2   | >.25                 |
|                                     | <b>TA<sup>actual</sup></b> |              |                 |                             |       |                      |
|                                     | mean±sem                   | p against 0  | p against 1     |                             |       |                      |
| Letters + Disks<br>(whole-report)   | .12 ± .156                 | >.25         | <b>&lt;.001</b> |                             |       |                      |
| Letters + Disks<br>(partial-report) | .61 ± .238                 | <b>0.036</b> | 0.155           |                             |       |                      |
|                                     |                            |              |                 |                             |       |                      |

**Supplementary Table 7.** Objective Performance in Experiment 3

| EXP 3                     | ST                   | Letter & Face<br>Dual-Task<br>(face-DT) | Letter & Disk<br>Dual-Task<br>(disk-DT) | Two-way ANOVA p-values     |           |                         |
|---------------------------|----------------------|-----------------------------------------|-----------------------------------------|----------------------------|-----------|-------------------------|
|                           |                      |                                         |                                         | stimulus<br>[face vs disk] | attention | stimulus x<br>attention |
| Blended Faces             | .76 ± .014           | .71 ± .030                              | -                                       | <.001                      | <.001     | <.001                   |
| Blended Disks             | .75 ± .017           | -                                       | .53 ± .012                              |                            |           |                         |
| Letter                    | .81 ± .016           | .80 ± .020                              | .79 ± .019                              |                            |           |                         |
|                           | TA <sup>actual</sup> |                                         |                                         |                            |           |                         |
|                           | mean±sem             | p against 1                             | p against 0                             |                            |           |                         |
| Letter + Blended<br>Faces | .76 ± .072           | <.001                                   | 0.012                                   |                            |           |                         |
| Letter + Blended<br>Disks | .08 ± .074           | >.25                                    | <.001                                   |                            |           |                         |

**Supplementary Table 8.** PAS ratings in Experiment 3. We report the main effect of correctness (for each attention condition), attention (for correct and incorrect trials) and interaction in the same format as in Table 2 and 5.

| EXP 3              | ST                     | face-DT                | disk-DT                |                                       |
|--------------------|------------------------|------------------------|------------------------|---------------------------------------|
| Faces (correct)    | 2.2 ± .09              | 2.0 ± .12              | -                      | $\chi^2=63.1, p<.001$                 |
| Faces (incorrect)  | 1.9 ± .12              | 1.6 ± .09              | -                      | $\chi^2=50.5, p<.001$                 |
|                    | $\chi^2=74.6, p<.001$  | $\chi^2=108.1, p<.001$ | -                      | Interaction:<br>$\chi^2=0.40, p>.25$  |
|                    | ST                     | face-DT                | disk-DT                |                                       |
| Disks (correct)    | 2.2 ± .19              | -                      | 1.6 ± .17              | $\chi^2=326.9, p<.001$                |
| Disks (incorrect)  | 1.9 ± .21              | -                      | 1.5 ± .17              | $\chi^2=60.1, p<.001$                 |
|                    | $\chi^2=90.9, p<.001$  | -                      | $\chi^2=6.5, p=.01$    | Interaction:<br>$\chi^2=38.7, p<.001$ |
|                    | ST                     | face-DT                | disk-DT                |                                       |
| Letter (correct)   | 2.9 ± .13              | 2.7 ± .17              | 2.7 ± .17              | $\chi^2=47.7, p<.001$                 |
| Letter (incorrect) | 2.4 ± .14              | 2.3 ± .13              | 2.2 ± .13              | $\chi^2=18.0, p<.001$                 |
|                    | $\chi^2=105.6, p<.001$ | $\chi^2=95.5, p<.001$  | $\chi^2=141.4, p<.001$ | Interaction:<br>$\chi^2=.016, p>.25$  |

**Supplementary Table 9.** Metacognitive accuracy in Experiment 3

| EXP 3                 | ST                   | face-DT     | disk-DT     | Two-way ANOVA p-values     |           |                         |
|-----------------------|----------------------|-------------|-------------|----------------------------|-----------|-------------------------|
|                       |                      |             |             | stimulus<br>[disk vs face] | attention | stimulus x<br>attention |
| Blended Faces         | .58 ± .021           | .59 ± .014  | -           | 0.032                      | 0.232     | 0.082                   |
| Blended Disks         | .58 ± .018           | -           | .53 ± .008  |                            |           |                         |
| Letter                | .63 ± .012           | .61 ± .022  | .62 ± .016  |                            |           |                         |
|                       | TA <sup>actual</sup> |             |             |                            |           |                         |
|                       | mean±sem             | p against 0 | p against 1 |                            |           |                         |
| Letters + Faces (n=6) | .91 ± .320           | 0.031       | >.25        |                            |           |                         |
| Letter + Disks (n=8)  | .59 ± .299           | 0.091       | 0.208       |                            |           |                         |
